# Supplementary material for: Ultrafiltration Membranes Functionalized with Copper Oxide and Zwitterions for Fouling Resistance
Source: MDPI journal article supplement (doi:10.3390/membranes12050544), 2022-05-23
Supplement: s1 [file s1]

Supplementary Material

# Ultrafiltration Membranes Functionalized with Copper Oxide and Zwitterions for Fouling Resistance

Cannon Hackett <sup>1</sup>, Mojtaba Abolhassani <sup>1</sup>, Lauren F. Greenlee <sup>2</sup> and Audie K. Thompson <sup>1,\*</sup>

<sup>1</sup> Ralph E. Martin Department of Chemical Engineering, University of Arkansas, Fayetteville, AR 72701, USA; cjhackett@uark.edu (C.H.); Abolhassani.mo@gmail.com (M.A.)

<sup>2</sup> Department of Chemical Engineering, Pennsylvania State University, University Park, PA 16802, USA; lfg5271@psu.edu

\* Correspondence: akt022@uark.edu; Tel.: +1-479-575-3857

**Citation:** Hackett, C.; Abolhassani, M.; Greenlee, L.F.; Thompson, A.K. Ultrafiltration Membranes Functionalized with Copper Oxide and Zwitterions for Fouling Resistance. *Membranes* **2022**, *12*, 544. <https://doi.org/10.3390/membranes12050544>

Academic Editor: Teresa Poerio

Received: 25 April 2022

Accepted: 20 May 2022

Published: 23 May 2022

**Publisher's Note:** MDPI stays neutral with regard to jurisdictional claims in published maps and institutional affiliations.

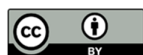

**Copyright:** © 2022 by the authors. Licensee MDPI, Basel, Switzerland. This article is an open access article distributed under the terms and conditions of the Creative Commons Attribution (CC BY) license (<https://creativecommons.org/licenses/by/4.0/>).

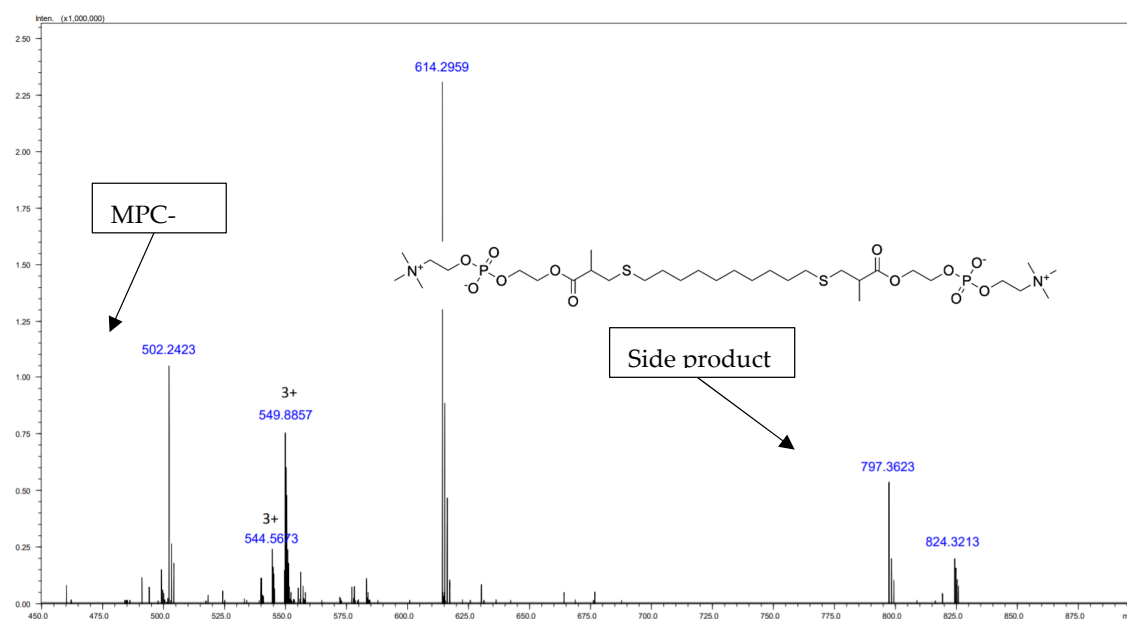

**Figure S1.** Mass spectrometry results for the MPC-SH synthesis, with a reaction time of 8 hours. The side product structure is shown on the right.

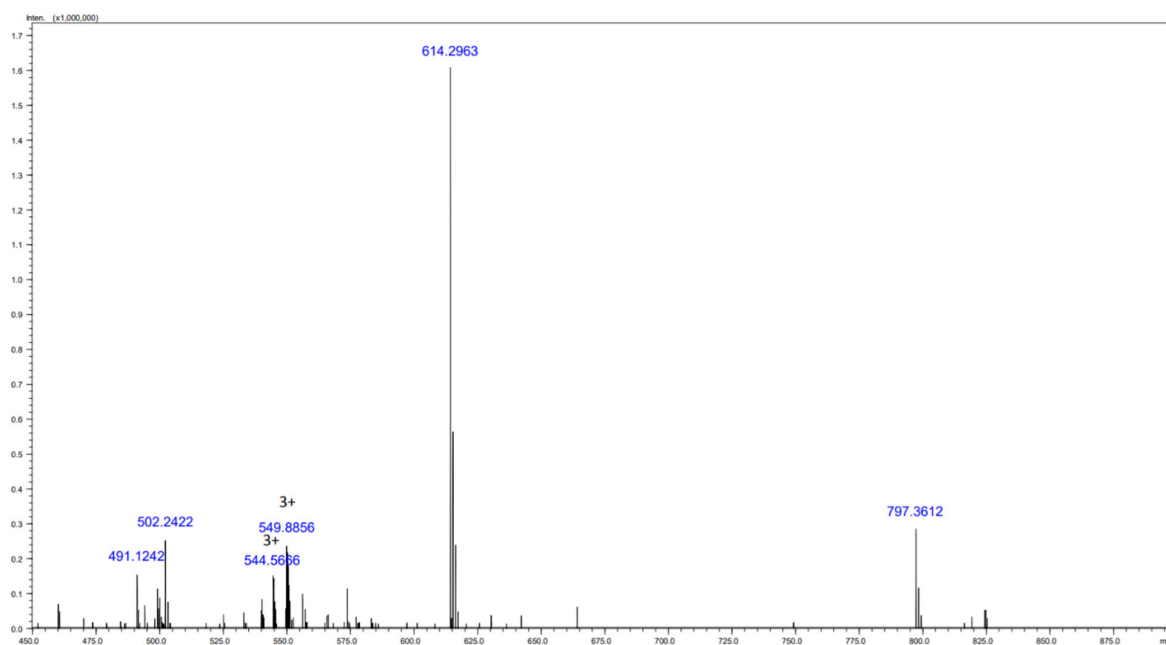

**Figure S2.** Mass spectrometry results for the MPC-SH synthesis, with a reaction time of 20 hours.

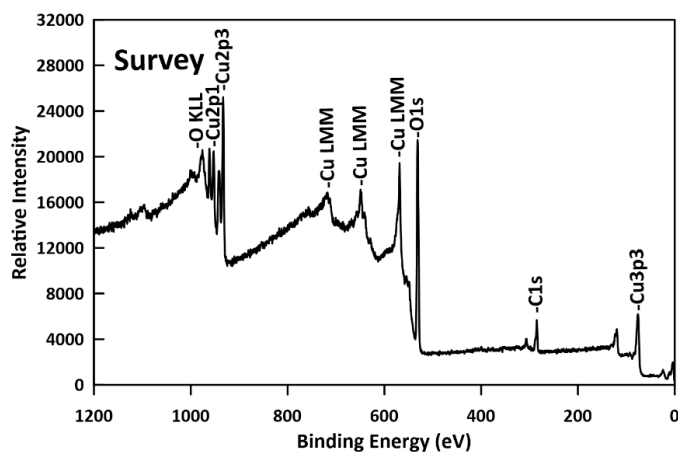

Figure S3. XPS survey spectrum for CuO NPs.

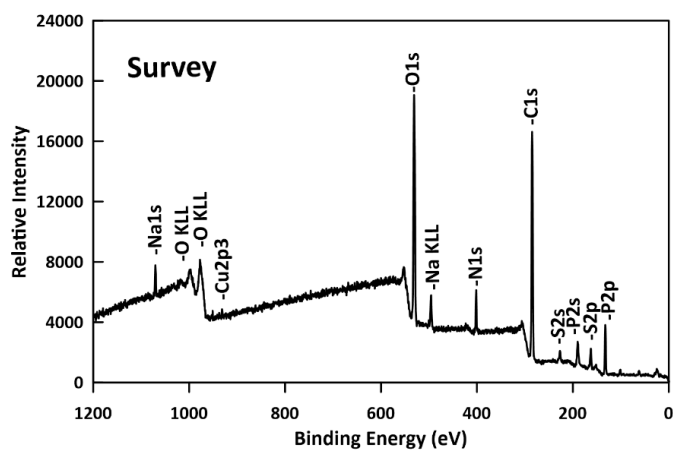

Figure S4. XPS survey spectrum for CuO/MPC NPs.

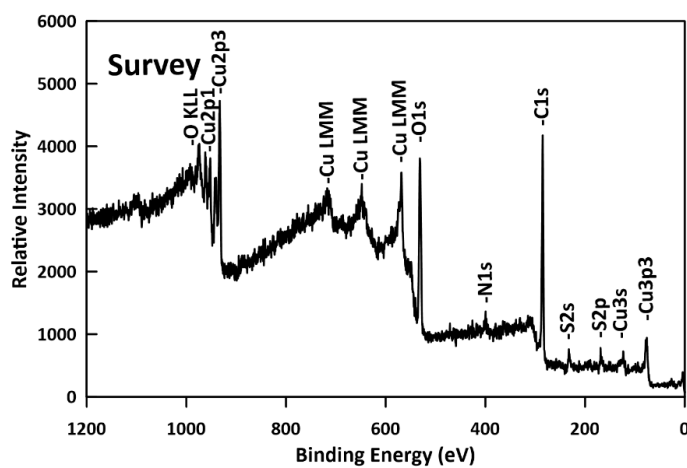

Figure S5. XPS survey spectrum for PES/PDA/MPC/CuO membrane.
